# Supplementary material
Source: PubMed Central journal article supplement (PMC8260141)
Supplement: kiab167_supplementary_data.pdf [file kiab167_supplementary_data.pdf]

# 1 Supplemental Figures

## 2 Supplemental Figure S1

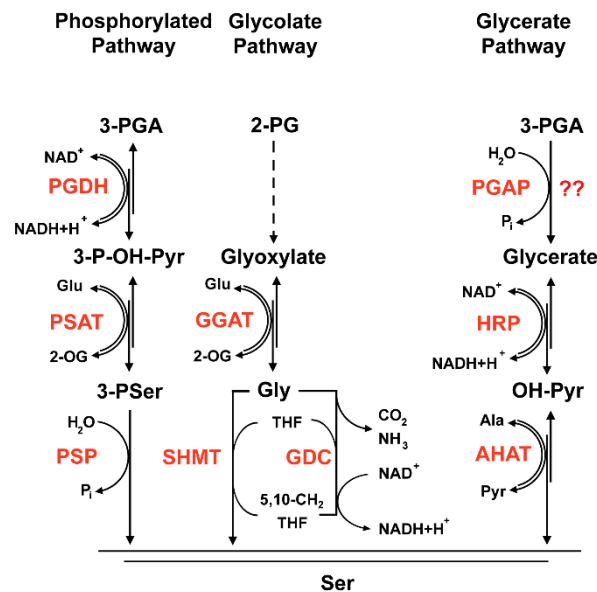

3

4 **Supplemental Figure S1. Pathways for serine biosynthesis in plants.** In theory, three serine  
 5 biosynthesis pathways exist in plants: the phosphorylated pathway, the glycolate pathway and  
 6 the glycerate pathway. The phosphorylated pathway is catalyzed by the three enzymes, 3-  
 7 phosphoglycerate dehydrogenase (PGDH), 3-phosphoserine aminotransferase (PSAT), and 3-  
 8 phosphoserine phosphatase (PSP), and starts from 3-phosphoglycerate (3-PGA) generated by  
 9 plastidial glycolysis (Ros et al., 2014). The glycolate pathway is part of photorespiration and  
 10 therefore starts from 2-phosphoglycolate (2-PG). The reactions directly involved in  
 11 photorespiratory serine biosynthesis are catalyzed by glutamate-glyoxylate aminotransferase  
 12 (GGAT), glycine decarboxylase (GDC) and serine hydroxymethyltransferase (SHMT). The  
 13 glycerate pathway functions in reverse orientation to photorespiration and is carried out by 3-  
 14 phosphoglycerate phosphatase (PGAP), hydroxypyruvate dehydrogenase (HRP) and alanine-  
 15 hydroxypyruvate aminotransferase (AHAT). Abbreviations: pyruvate (Pyr), 3-  
 16 phosphohydroxypyruvate (3-P-OH-Pyr), 3-phosphoserine (3-PSer), tetrahydrofolate (THF),  
 17 5,10-methylenetetrahydrofolate (5,10-CH<sub>2</sub>-THF), carbon dioxide (CO<sub>2</sub>), ammonia (NH<sub>3</sub>),  
 18 inorganic phosphate (P<sub>i</sub>), nicotinamide dinucleotide (NAD(H)), 2-oxoglutarate (2-OG). Red  
 19 font indicates enzymes. Solid lines indicate one reaction and dashed lines indicate multiple  
 20 reactions.

21

22 Supplemental Figure S2

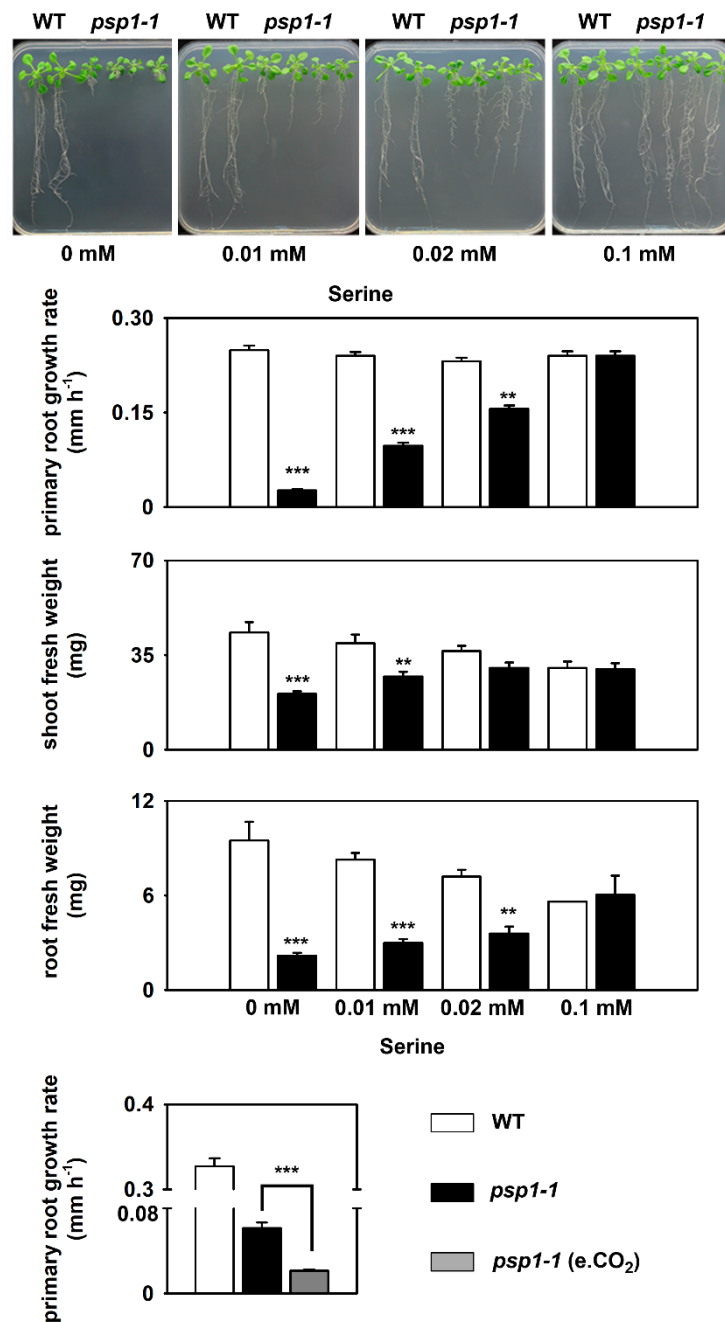

23

24 **Supplemental Figure S2. Growth of *psp1-1* mutants.** Growth phenotype of *psp1-1* mutants  
 25 and wild type (WT) plants on growth medium supplemented with 0, 0.01, 0.02 and 0.1mM  
 26 serine or at elevated (4000  $\mu\text{l l}^{-1}$ ) CO<sub>2</sub> (e.CO<sub>2</sub>). Data presented are means  $\pm$  SE of n = 20.  
 27 Asterisks indicate significant differences based on Student's t test (\*\*  $P < 0.01$ ; \*\*\*  $P < 0.001$ ).  
 28

29 **Supplemental Figure S3**

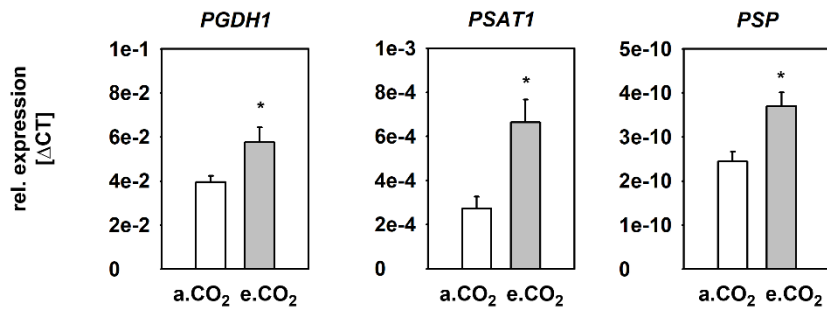

30

31 **Supplemental Figure S3. Expression analysis of PPSB genes at ambient and elevated CO<sub>2</sub>.**

32 Expression analysis of PPSB genes in empty vector (EV) control plants grown at ambient or  
33 elevated CO<sub>2</sub>. Data presented are means ± SE of n = 5. Asterisks indicate significantly different  
34 values by the Student's t test (\* P < 0.05).

35

36 **Supplemental Figure S4.**

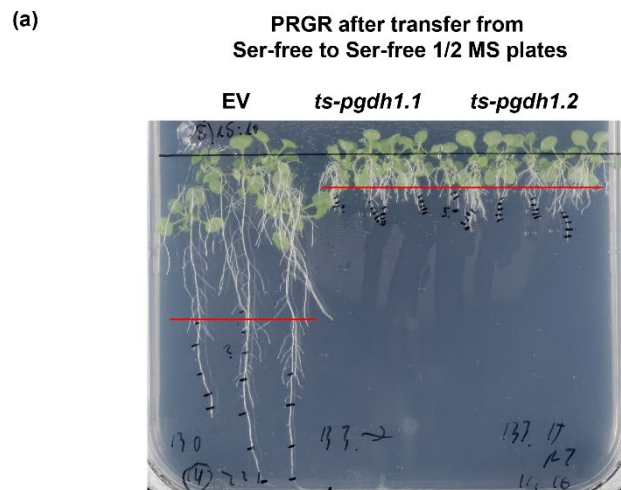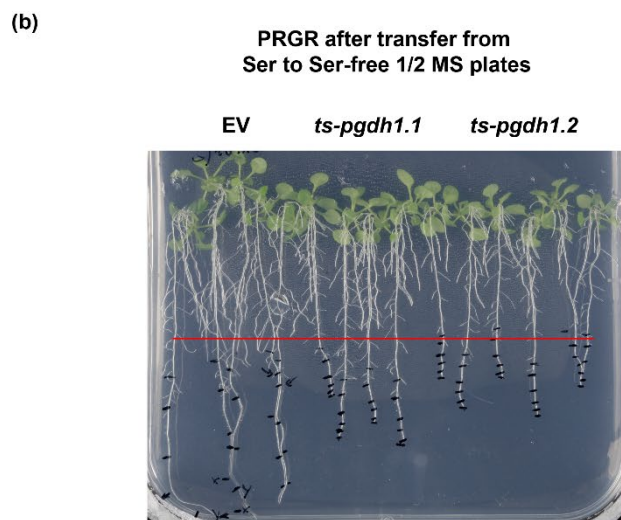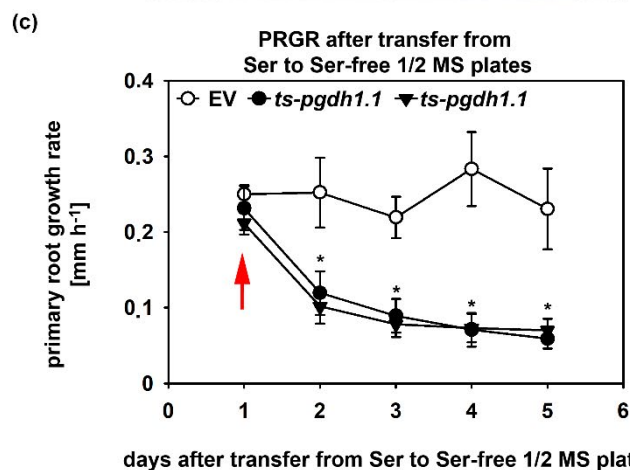

37

38 **Supplemental Figure S4. *PGDH1*-silenced lines require continuous supply of external**  
 39 **serine to maintain normal plant growth. *PGDH1*-silenced lines (*ts-pgdh1.1* and *ts-pgdh1.2*)**  
 40 **and empty vector (EV) control plants were germinated and pre-cultivated on half-strength (1/2)**  
 41 **MS medium without (a) or with (b) supplementation of 0.1mM serine. After ten days plants**  
 42 **were transferred to serine-free half-strength MS medium and the primary root growth rate**  
 43 **(PRGR) was determined further. Red lines indicate the average root length of plants before**  
 44 **transfer to serine-free half-strength MS medium. (c) Data presented are means ± SE of n > 10.**  
 45 **Asterisks indicate significant differences based on Student's t test (\* P < 0.05). Red arrow**

| 46 indicates the average root length of plants before transferred to serine-free half-strength MS  
47 medium.

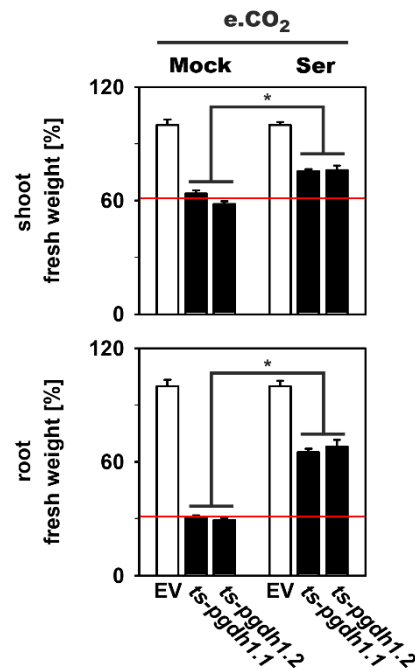

49

50 **Supplemental Figure S5. Growth of *PGDH1*-silenced lines at elevated CO<sub>2</sub> is significantly**  
 51 **improved by external serine.** Shoot and root biomasses of empty vector (EV) control plants  
 52 and *PGDH1*-silenced lines (*ts-pgdh1.1* and *ts-pgdh1.2*) were determined at e.CO<sub>2</sub> (elevated  
 53 CO<sub>2</sub>, 4000 μl l<sup>-1</sup>) and e.CO<sub>2</sub> supplemented with 0.1 mM serine conditions. Therefore, plants  
 54 were germinated and pre-cultivated on half-strength MS medium at ambient CO<sub>2</sub> for eight days  
 55 before transfer to vertical plates containing either half-strength MS medium (Mock) or half-  
 56 strength MS medium supplemented with 0.1mM serine (Ser), and incubated for additional eight  
 57 days at elevated CO<sub>2</sub>. Relative fresh weight as percent of EV control plants was calculated.  
 58 Data presented are means ± SE of n > 5. Asterisks indicate significant differences based on  
 59 Student's t test (\* P < 0.05). Red lines indicate the average shoot or root fresh weight of  
 60 *PGDH1*-silenced lines grown on Mock.

61

62 **Supplemental Figure S6**

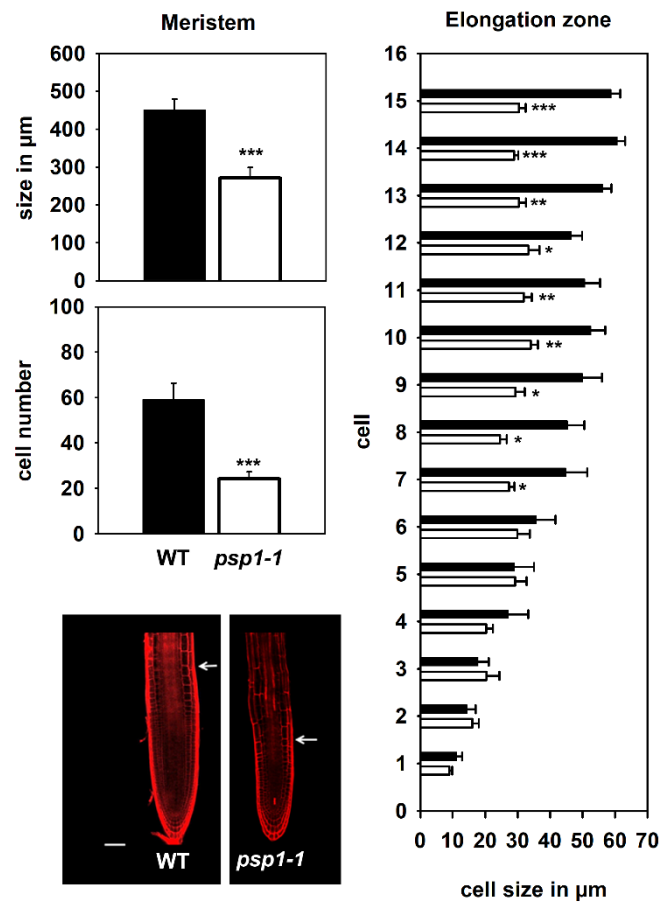

63

64 **Supplemental Figure S6. Size of the meristem and elongation zone in wild type and *psp1-***  
 65 ***I* mutant plants.** Quantification of size and cell number of the meristem and sizes of the first  
 66 first fifteen cells of the elongation zone of WT (black bars) and *psp1-1* mutant (white bars) plants  
 67 and visualization of roots by propidium iodide staining. White arrows indicate the beginning of  
 68 the elongation zone in epidermal cell layers. Data presented are means  $\pm$  SE. Asterisks indicate  
 69 significant differences based on Student's t test (\*  $P < 0.05$ ; \*\*  $P < 0.01$ ; \*\*\*  $P < 0.001$ ). Scale  
 70 bar: 50  $\mu\text{m}$ .

71

72 **Supplemental Figure S7**

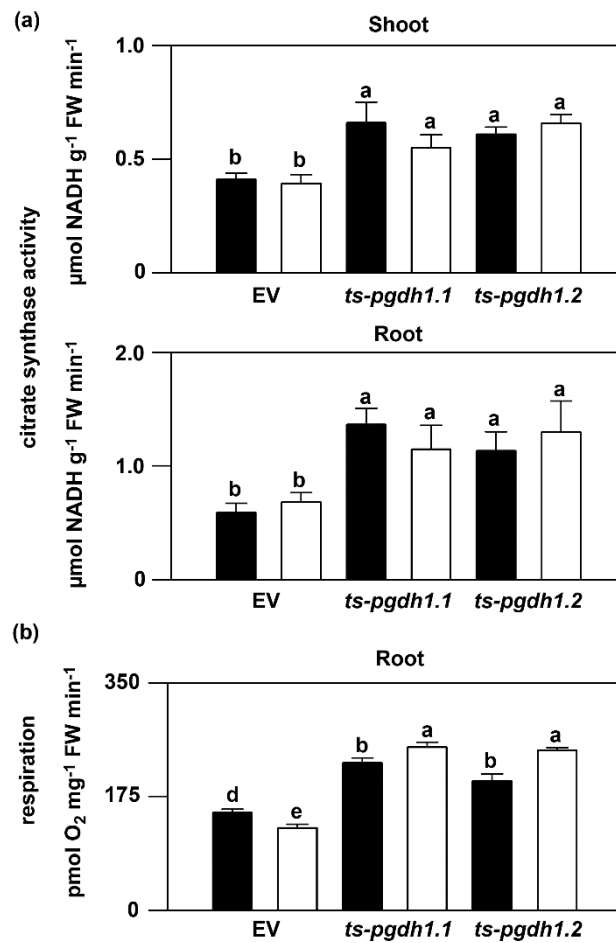

73

74 **Supplemental Figure S7. Citrate synthase activity in *PGDH1*-silenced lines.** The activity of  
 75 citrate synthase was analyzed in shoot and root tissue of empty vector (EV) control plants and  
 76 *PGDH1*-silenced lines (*ts-pgdh1.1* and *ts-pgdh1.2*) grown at ambient CO<sub>2</sub> (a.CO<sub>2</sub>, 400 μl l<sup>-1</sup>;  
 77 black bars) or elevated CO<sub>2</sub> (e.CO<sub>2</sub>, 4000 μl l<sup>-1</sup>; white bars). (b) The oxygen consumption in  
 78 pmol O<sub>2</sub> mg<sup>-1</sup> min<sup>-1</sup> is shown for roots of empty vector (EV) control plants and *PGDH1*-silenced  
 79 lines (*ts-pgdh1.1* and *ts-pgdh1.2*) grown at ambient CO<sub>2</sub> (a.CO<sub>2</sub>, 400 μl l<sup>-1</sup>; black bars) or  
 80 elevated CO<sub>2</sub> (e.CO<sub>2</sub>, 4000 μl l<sup>-1</sup>; white bars). For (a) and (b), data presented are means ± SD  
 81 of n = 5; one-way ANOVA followed by Fisher's least significant difference test (*P* < 0.05) were  
 82 performed and columns with the same letter are not significantly different.



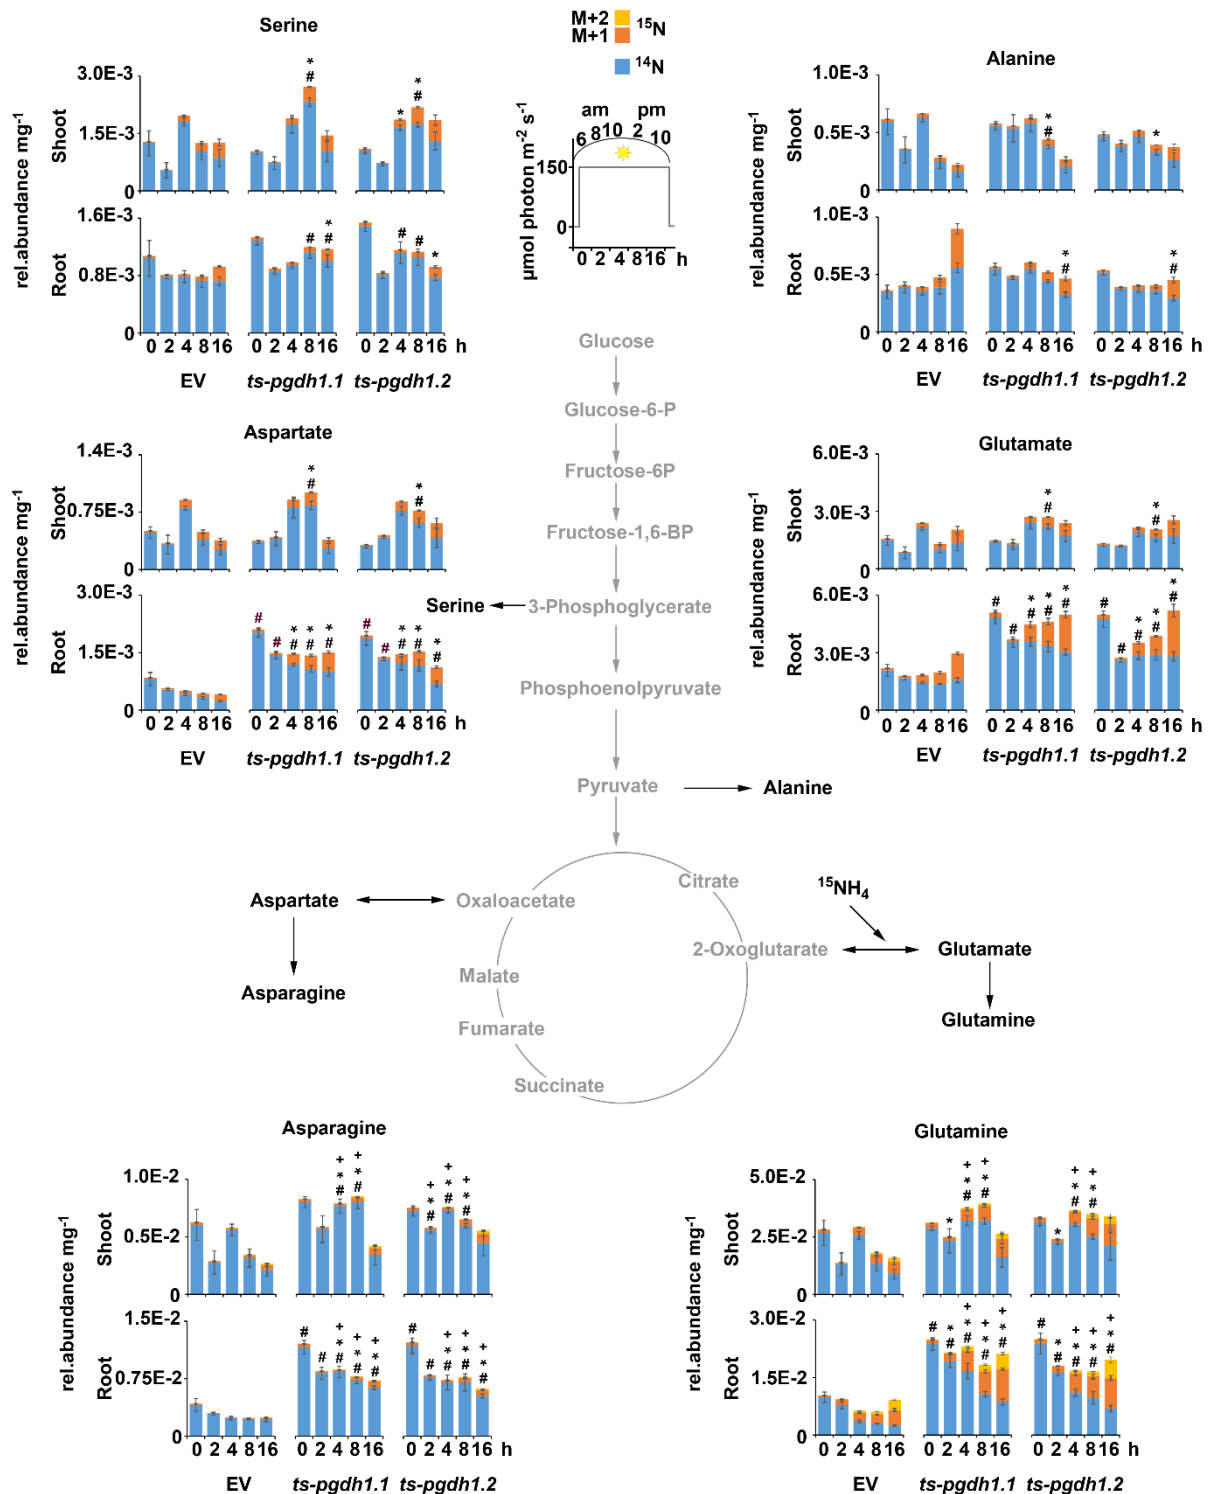

84

85 **Supplemental Figure S8. Quantification of  $^{15}\text{N}$ -labeled amino acids in *PGDH1*-silenced**  
 86 **lines.**  $^{14}\text{N}$ - (blue) and  $^{15}\text{N}$ -isotopes (M+1 orange; M+2 yellow) of major amino acids are shown  
 87 in shoot and root tissue of empty vector (EV) control plants and *PGDH1*-silenced lines (*ts-*  
 88 *pgdh1.1* and *ts-pgdh1.2*) in a 16 hour time course (see inset). Data presented as relative (rel.)  
 89 abundance per mg fresh weight (FW) are means  $\pm$  SE of  $n = 5$ . Sharp (M0), asterisk (M+1) and

90 cross (M+2) indicate significantly different values between EV and *PGDHI*-silenced lines by  
91 the Student's t test (#, \*, +  $P < 0.05$ ).

92

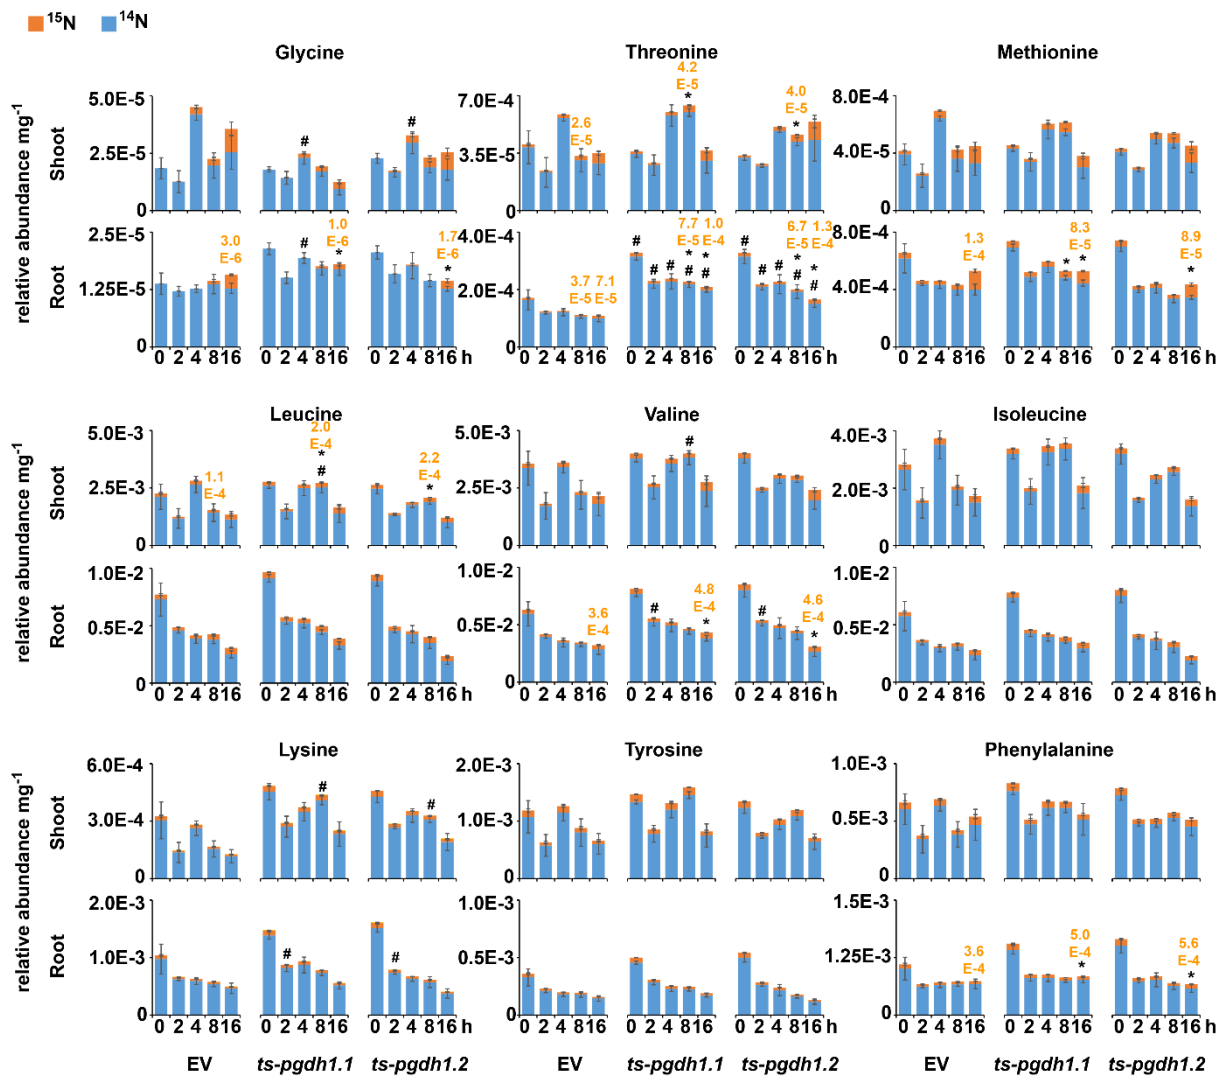

94

95 **Supplemental Figure S9. Quantification of <sup>15</sup>N-labeled amino acids in *PGDH1*-silenced**  
 96 **plants.** <sup>14</sup>N- (blue) and <sup>15</sup>N- isotopes (M+1; orange) of minor abundant amino acids are shown  
 97 for shoot and root tissues of empty vector (EV) control plants and *PGDH1*-silenced lines (*ts-*  
 98 *pgdh1.1* and *ts-pgdh1.2*) in a 16 hour time course. Data presented are means ± SE of n = 5.  
 99 Orange Numbers are significantly different values for M+1 between EV and *PGDH1*-silenced  
 100 lines. Sharp (M0) and asterisk (M+1) indicate significantly different values between EV and  
 101 *PGDH1*-silenced lines by the Student's t test (#, \* *P* < 0.05).  
 102

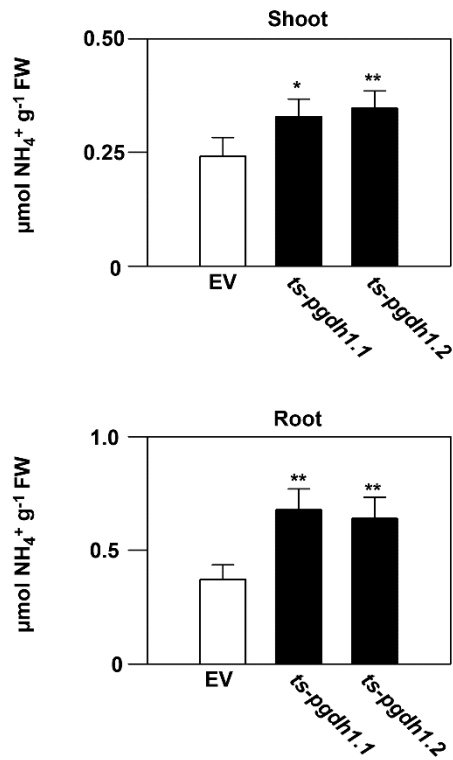

104

105 **Supplemental Figure S10. Changes in the ammonium content in *PGDH1*-silenced lines.**

106 The ammonium content was analyzed in shoot and root tissues of empty vector (EV) control  
107 plants and *PGDH1*-silenced lines (*ts-pgdh1.1* and *ts-pgdh1.2*). Data presented are means  $\pm$  SD  
108 of  $n = 5$ . Asterisks indicate significantly different values between EV and *PGDH1*-silenced  
109 lines by the Student's t test (\*  $P < 0.05$ ; \*\*  $P < 0.01$ ).

110

111 **Supplemental Figure S11**

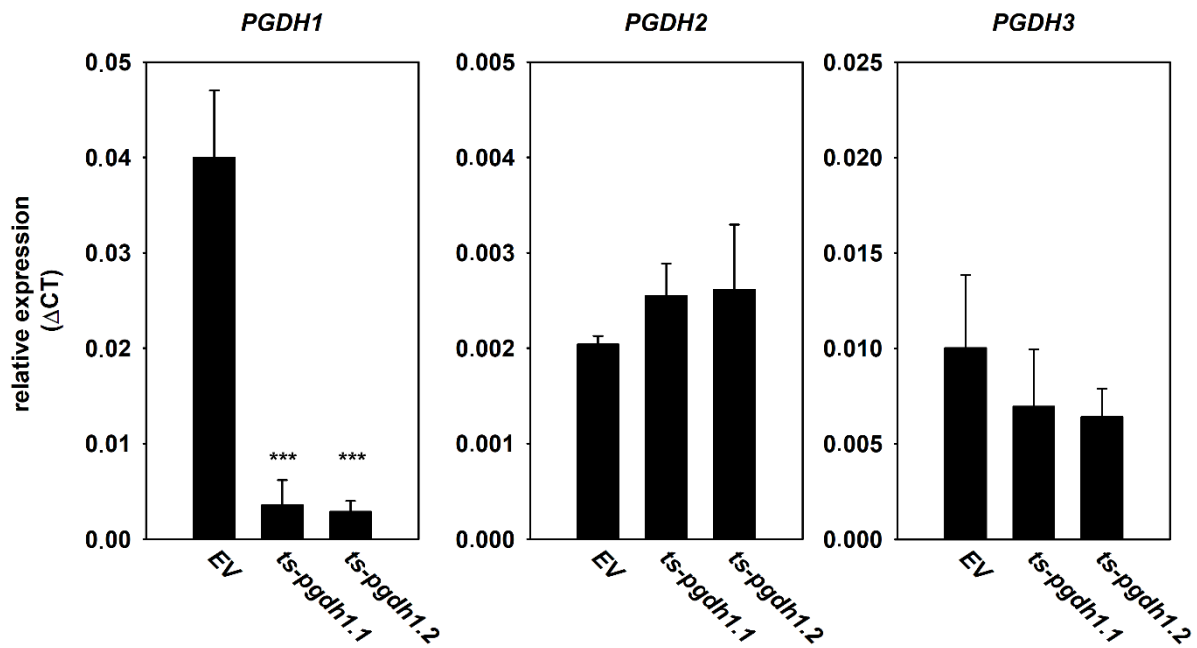

112

113 **Supplemental Figure S11. Expression analysis of *PGDH* genes in *PGDH1*-silenced lines.**  
114 Expression of the *PGDH* genes was quantified by RT-qPCR in *PGDH1*-silenced lines (*ts-*  
115 *pgdh1.1* and *ts-pgdh1.2*) and empty vector (EV) control plants. Data presented are means ± SE  
116 of n = 5. Asterisks indicate significant differences between *PGDH1*-silenced lines and EV  
117 plants based on Student's t test (\*\*\*)  $P < 0.001$ ). For detailed characterization of *PGDH1*-  
118 silenced plants please see Benstein et al. (2013).

119

## 1 Supplemental Table S1

| Lab.ID | AGI       | Gene          | Enzyme                           | Orientation | Sequence                    |
|--------|-----------|---------------|----------------------------------|-------------|-----------------------------|
| 859    | At4g34200 | <i>PGDH1</i>  | 3-phosphoglycerate dehydrogenase | FWD         | gacactgaagaagattgggg        |
| 739    | At4g34200 | <i>PGDH1</i>  | 3-phosphoglycerate dehydrogenase | REV         | ccggtgagatttaagattcaag      |
| 743    | At4g35630 | <i>PSAT1</i>  | phosphoserine aminotransferase   | FWD         | ggagaagtctgaattggaagc       |
| 744    | At4g35630 | <i>PSAT1</i>  | phosphoserine aminotransferase   | REV         | gcaaaaacccttaaaaactaagcatgc |
| 410    | At1g18640 | <i>PSP</i>    | phosphoserine phosphatase        | FWD         | caagagacccccaaggctat        |
| 411    | At1g18640 | <i>PSP</i>    | phosphoserine phosphatase        | REV         | tgccaagaatcgatgctaca        |
| 1562   | AT5G04140 | <i>GLU1</i>   | glutamate synthase               | FWD         | gggaatctcattgctttcaagt      |
| 1563   | AT5G04140 | <i>GLU1</i>   | glutamate synthase               | REV         | tgacacactccagtgatgc         |
| 1600   | AT2G41220 | <i>GLU2</i>   | glutamate synthase               | FWD         | tccgtgtagtgcatctcaa         |
| 1601   | AT2G41220 | <i>GLU2</i>   | glutamate synthase               | REV         | aacgtctcctagccagctc         |
| 1602   | AT5G53460 | <i>GLT1</i>   | glutamate synthase               | FWD         | tgttgctcctcatgatt           |
| 1603   | AT5G53460 | <i>GLT1</i>   | glutamate synthase               | REV         | ccagcagaaggaagtacaagc       |
| 1729   | AT3G03910 | <i>GDH3</i>   | glutamate dehydrogenase          | FWD         | acttcgagtggttcagaacat       |
| 1730   | AT3G03910 | <i>GDH3</i>   | glutamate dehydrogenase          | REV         | tcacatgagtgctctgaca         |
| 1731   | AT5G07440 | <i>GDH2</i>   | glutamate dehydrogenase          | FWD         | ggacgcaactggaagtctca        |
| 1732   | AT5G07440 | <i>GDH2</i>   | glutamate dehydrogenase          | REV         | accaagagcgcgatggaatga       |
| 1733   | AT5G18170 | <i>GDH1</i>   | glutamate dehydrogenase          | FWD         | atggatactgcctgcagtt         |
| 1734   | AT5G18170 | <i>GDH1</i>   | glutamate dehydrogenase          | REV         | tgccctgatgtgctttccg         |
| 1592   | AT5G37600 | <i>GLN1,1</i> | glutamine synthetase             | FWD         | ccactgacaaaatcattgctg       |
| 1593   | AT5G37600 | <i>GLN1,1</i> | glutamine synthetase             | REV         | tcactggtccaggtagagtctct     |
| 1594   | AT3G17820 | <i>GLN1,3</i> | glutamine synthetase             | FWD         | ggccctcaggacctaacta         |
| 1595   | AT3G17820 | <i>GLN1,3</i> | glutamine synthetase             | REV         | tccacaatgtcacaccaat         |
| 1596   | AT5G35630 | <i>GLN2</i>   | glutamine synthetase             | FWD         | gtggaggcaataacatcttgg       |
| 1597   | AT5G35630 | <i>GLN2</i>   | glutamine synthetase             | REV         | tgtttgttggattggtctca        |
| 1723   | AT1G48470 | <i>GLN1;5</i> | glutamine synthetase             | FWD         | tagcaccgatcaagctgccg        |
| 1724   | AT1G48470 | <i>GLN1;5</i> | glutamine synthetase             | REV         | gatctccggcctgctgtaa         |
| 1725   | AT5G16570 | <i>GLN1;4</i> | glutamine synthetase             | FWD         | ggtctgggttgctcgttaca        |
| 1726   | AT5G16570 | <i>GLN1;4</i> | glutamine synthetase             | REV         | cccctgcaccattccaatct        |
| 2004   | AT1G66200 | <i>gln1.2</i> | glutamine synthetase             | FWD         | gtctcacgggacacatgaa         |
| 2005   | AT1G66200 | <i>gln1.2</i> | glutamine synthetase             | REV         | caagggttccagaggagtgt        |
| 2006   | AT1G64780 | <i>AMT1;2</i> | ammonium transporter             | FWD         | tgggtgggtgacggtaacta        |
| 2007   | AT1G64780 | <i>AMT1;2</i> | ammonium transporter             | REV         | tctccagcgaatgacccc          |
| 1590   | AT1G37130 | <i>NIA2</i>   | nitrate reductase                | FWD         | ctttgtagacgccgaactc         |
| 1591   | AT1G37130 | <i>NIA2</i>   | nitrate reductase                | REV         | ttagctcgttgattgtactctg      |
| 1560   | AT1G77760 | <i>NIA1</i>   | nitrate reductase                | FWD         | aagccgtacacattaaaggcta      |
| 1561   | AT1G77760 | <i>NIA1</i>   | nitrate reductase                | REV         | tcacctaacctcgttacc          |
| 1566   | AT1G08090 | <i>NRT2.1</i> | nitrate transporter              | FWD         | tggaaatcgactaccttgg         |
| 1567   | AT1G08090 | <i>NRT2.1</i> | nitrate transporter              | REV         | gtaacgcataccacagaatctt      |

## 2 Supplemental Table S1. Oligonucleotide sequences.

3
